# Supplementary material for: Early involvement of cellular stress and inflammatory signals in the pathogenesis of tubulointerstitial kidney disease due to UMOD mutations
Source: PubMed Central journal article supplement (PMC5547146; doi:10.1038/s41598-017-07804-6), 2017-08-07
Supplement: 41598_2017_7804_MOESM1_ESM.pdf [file 41598_2017_7804_MOESM1_ESM.pdf]

**Early involvement of cellular stress and inflammatory signals in the pathogenesis of tubulointerstitial kidney disease due to *UMOD* mutations**

Matteo Trudu<sup>1</sup>, Celine Schaeffer<sup>1</sup>, Michela Riba<sup>2</sup>, Masami Ikehata<sup>3,4</sup>, Paola Brambilla<sup>5</sup>, Piergiorgio Messa<sup>3,4</sup>, Filippo Martinelli-Boneschi<sup>5</sup>, Maria Pia Rastaldi<sup>3</sup>, Luca Rampoldi<sup>1\*</sup>

***SUPPLEMENTARY INFORMATION***

***Supplementary Figures 1-6, Supplementary Table 1***

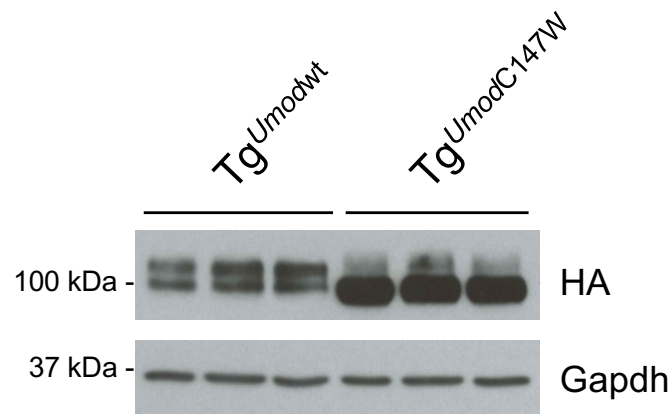

**Supplementary Figure 1.** Western blot analysis showing expression of HA-tagged transgenic uromodulin in kidneys of 1 month-old  $Tg^{Umodwt}$  and  $Tg^{UmodC147W}$  mice. The figure shows cropped blot images (full blots are reported in **Supplementary Figure 6**). Mutant uromodulin is strongly retained in the ER, as demonstrated by the accumulation of the lower molecular weight isoform, corresponding to uromodulin ER precursor. Gapdh was used as loading control.

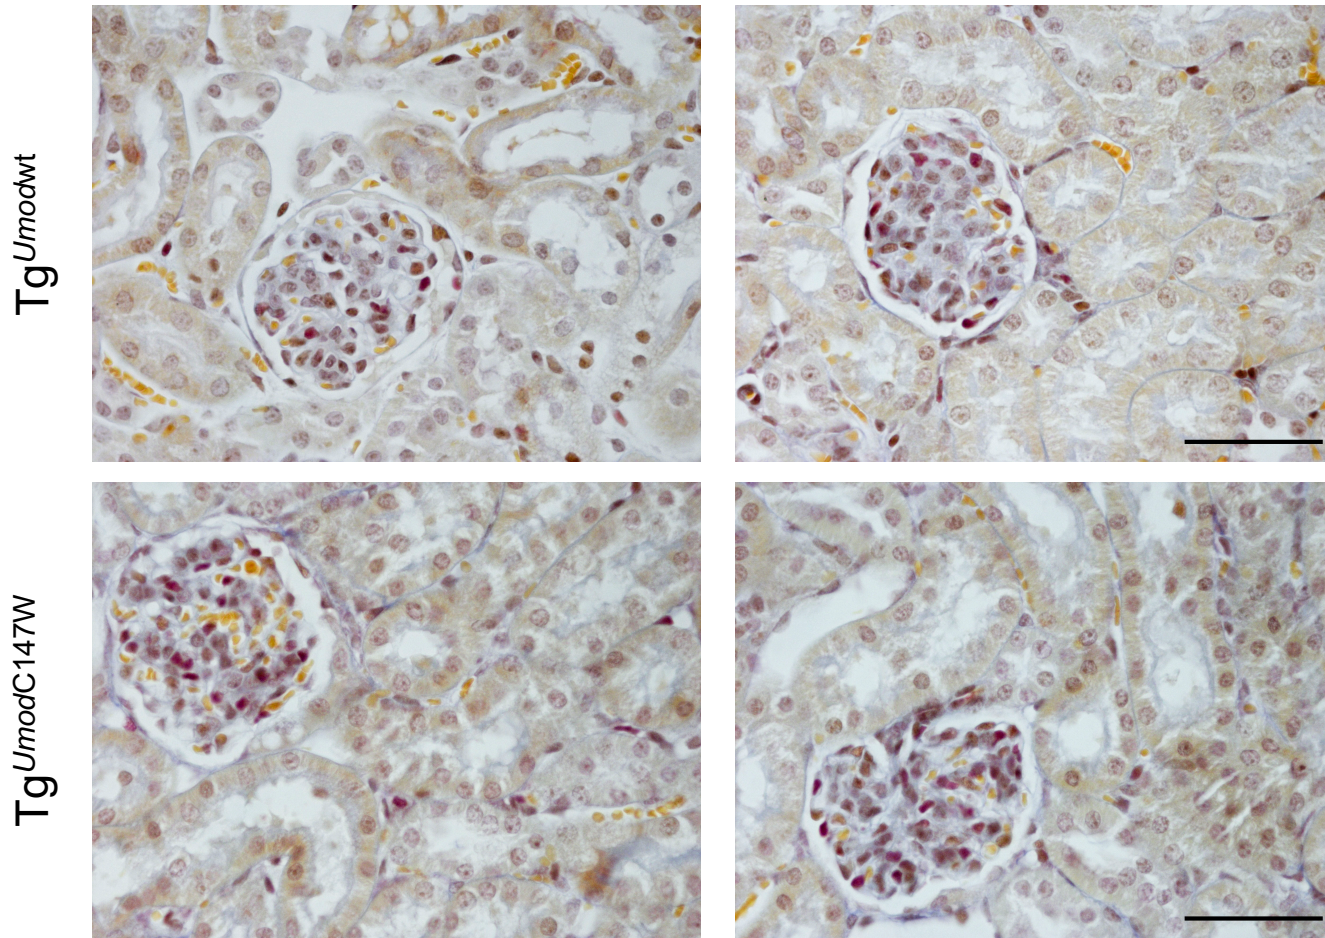

**Supplementary Figure 2.** Representative histological images of glomeruli in kidneys of 1 month-old  $Tg^{UmodC147W}$  and  $Tg^{Umodwt}$  (AFOG; scale bar 50  $\mu$ m). Quantification of mesangial hypercellularity, mesangial matrix expansion and focal/segmental glomerulosclerosis showed no difference between  $Tg^{UmodC147W}$  and  $Tg^{Umodwt}$  mice (data not shown, n = 9  $Tg^{Umodwt}$  and 6  $Tg^{UmodC147W}$ ).

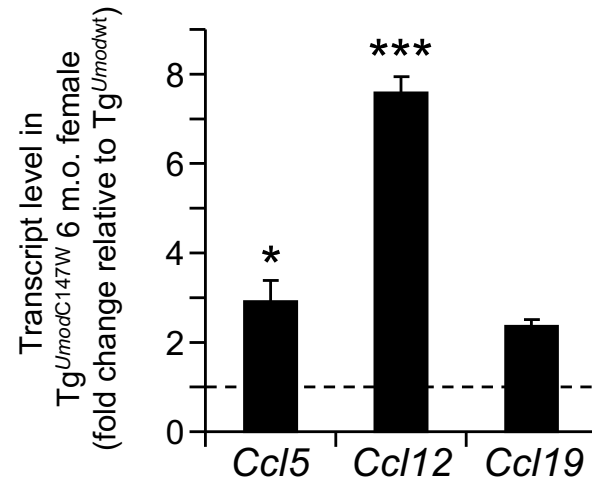

**Supplementary Figure 3.** Analysis by real-time RT-qPCR of the expression of selected chemokines in 6 month-old  $Tg^{UmodC147W}$  mice relative to age- and sex-matched  $Tg^{Umodwt}$  (n = 5/group). Data are expressed as mean  $\pm$  s.e.m. \* $P$  < 0.05; \*\*\* $P$  < 0.001 (unpaired  $t$ -test).

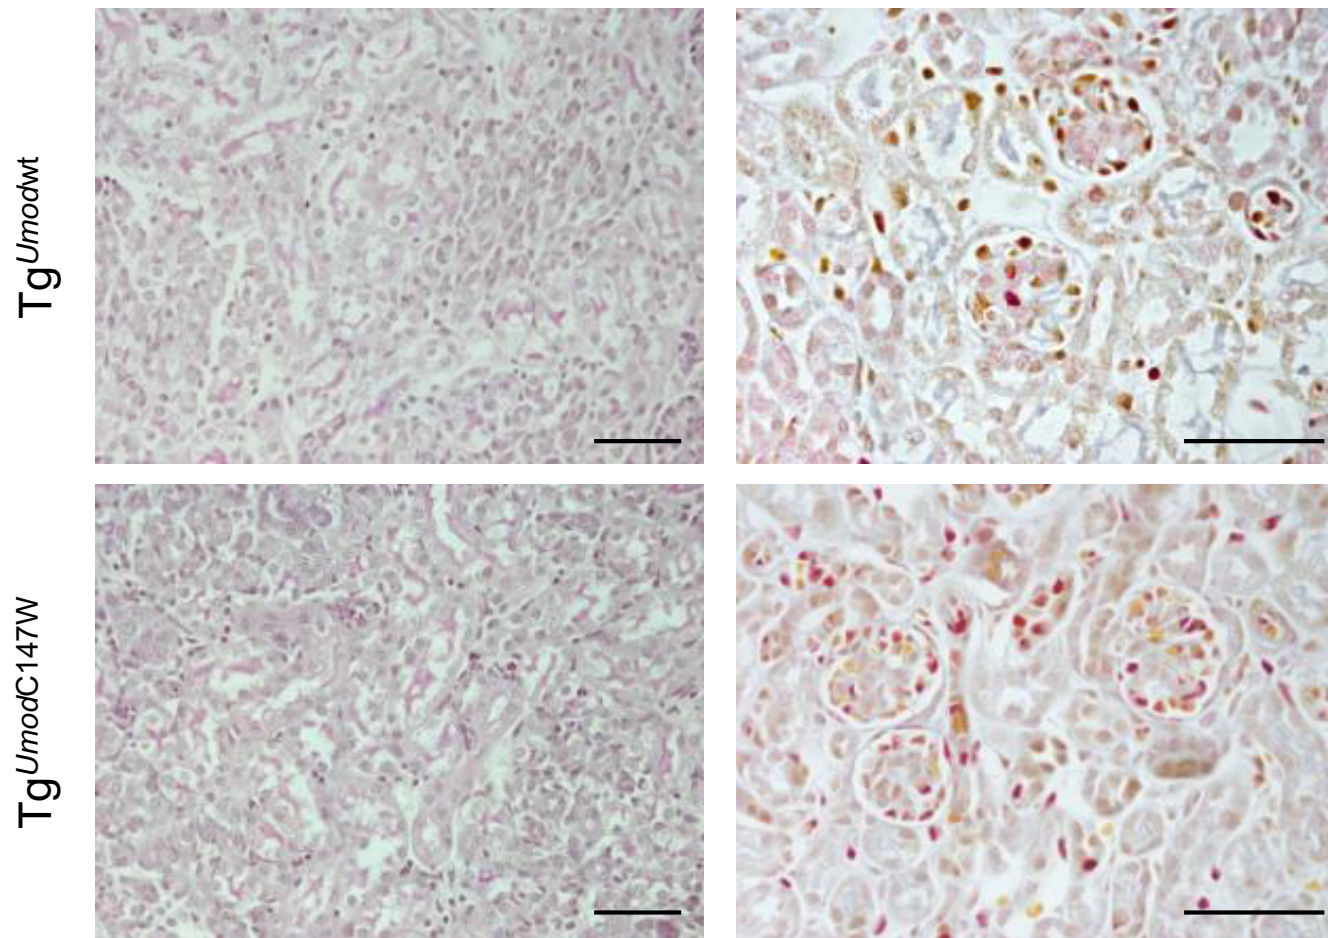

**Supplementary Figure 4.** Representative histological images of tubular architecture and glomeruli in kidneys of  $Tg^{UmodC147W}$  and  $Tg^{Umodwt}$  mice at p8 (PAS, left panels, and AFOG, right panels; scale bar 50  $\mu$ m). Quantification of tubular casts, tubular damage, interstitial inflammation, interstitial fibrosis, mesangial hypercellularity, mesangial matrix expansion and focal/segmental glomerulosclerosis showed no difference between  $Tg^{UmodC147W}$  and  $Tg^{Umodwt}$  mice (data not shown, n = 4/group).

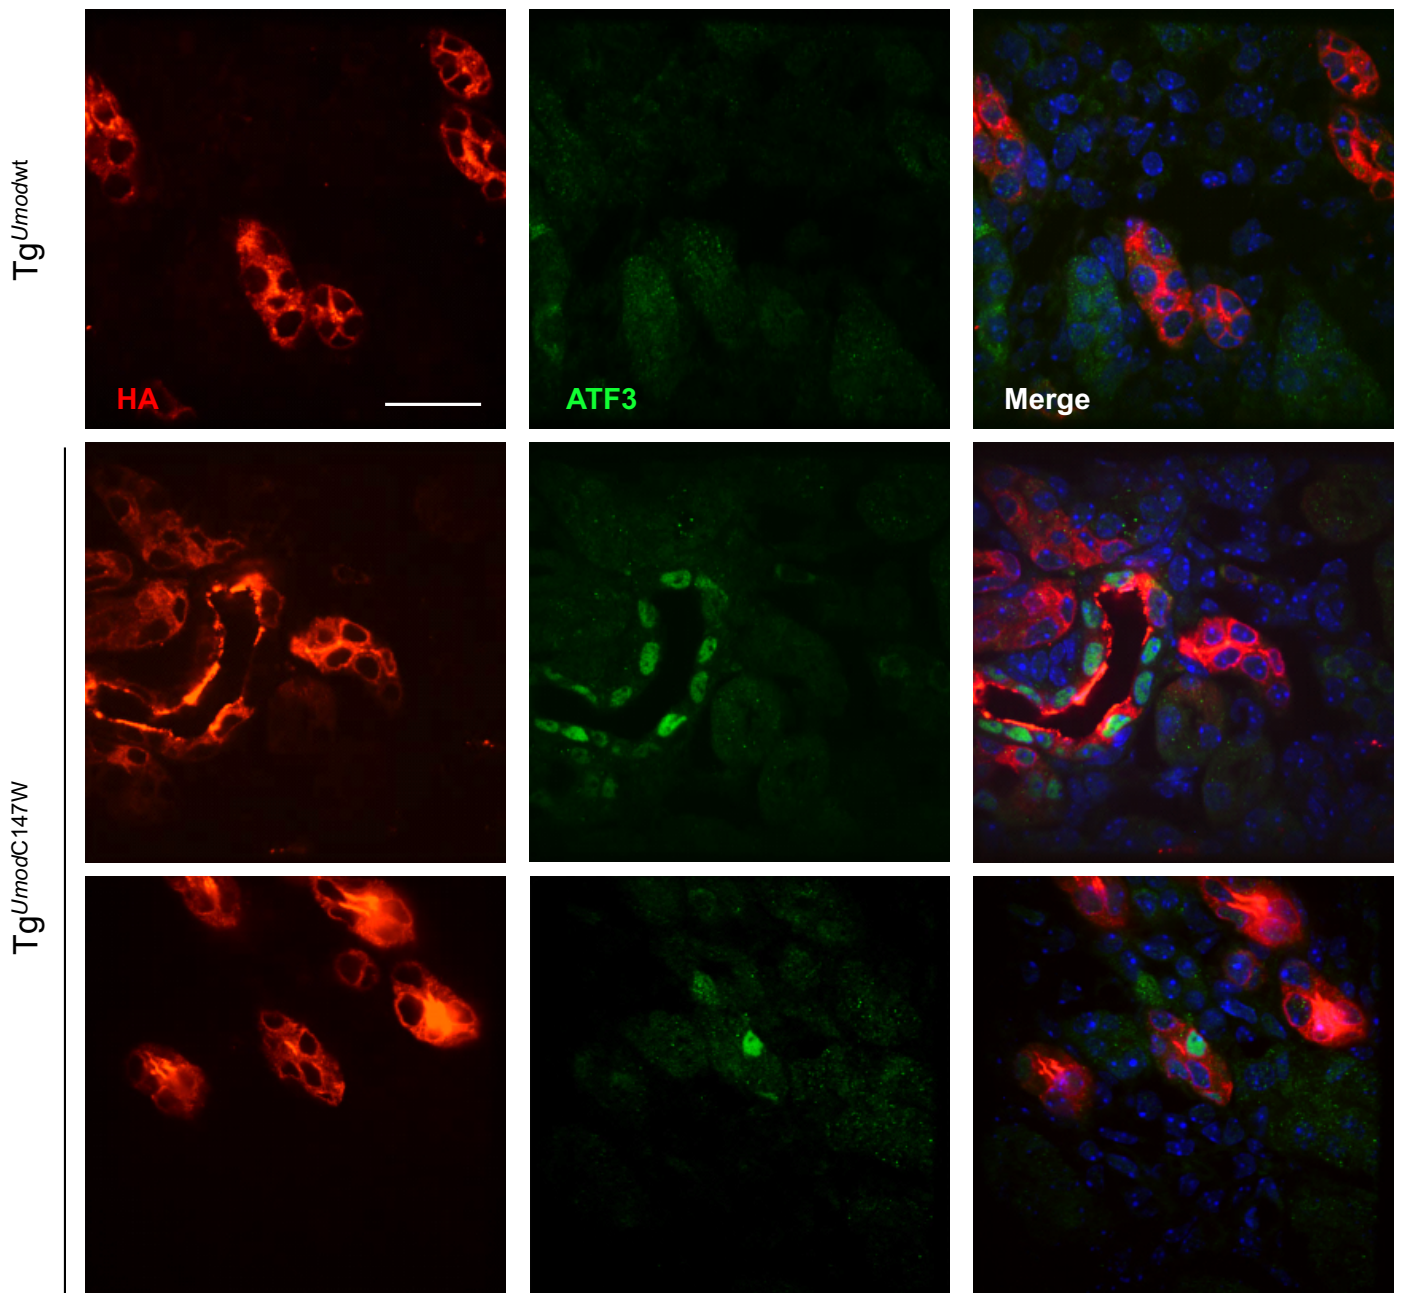

**Supplementary Figure 5.** Expression of Atf3 in the kidneys of p8 transgenic mice. Immunofluorescence analysis reveals that Atf3 is specifically detected in nuclei of TAL segments in kidneys of *Tg<sup>UmodC147W</sup>* mice (scale bar 15  $\mu$ m).

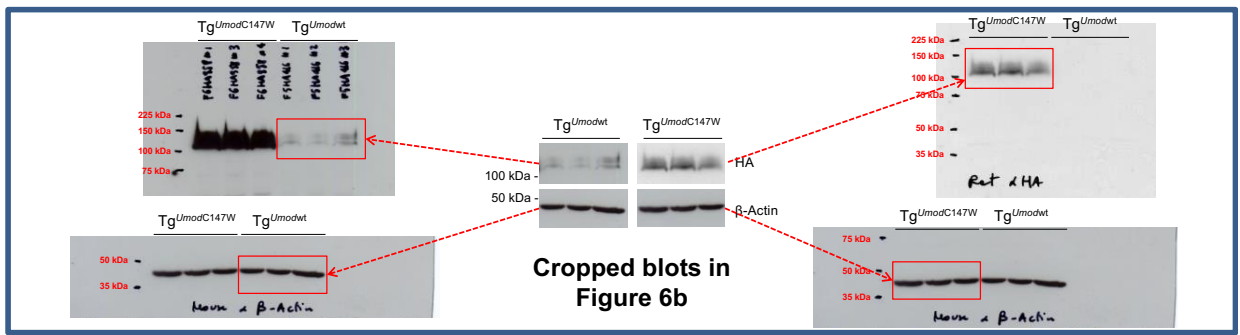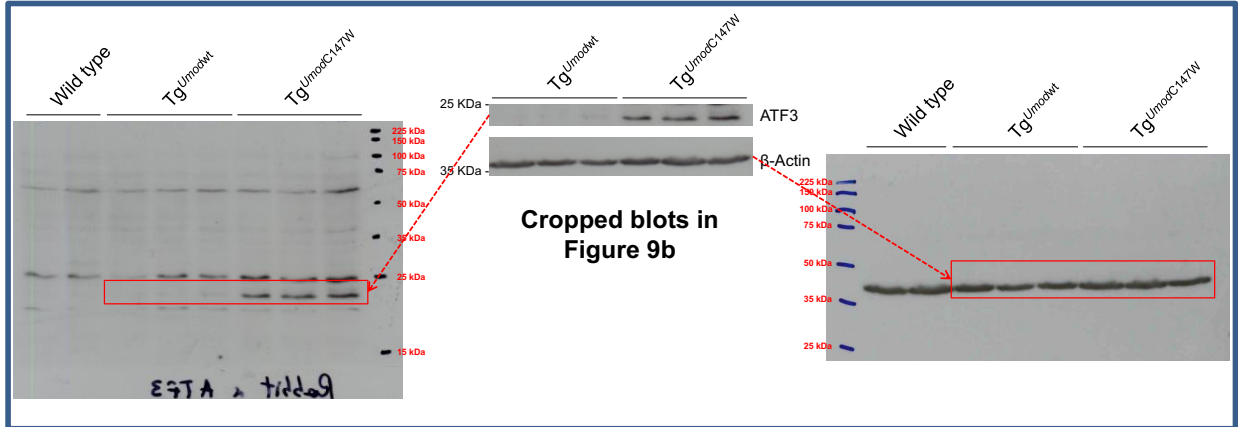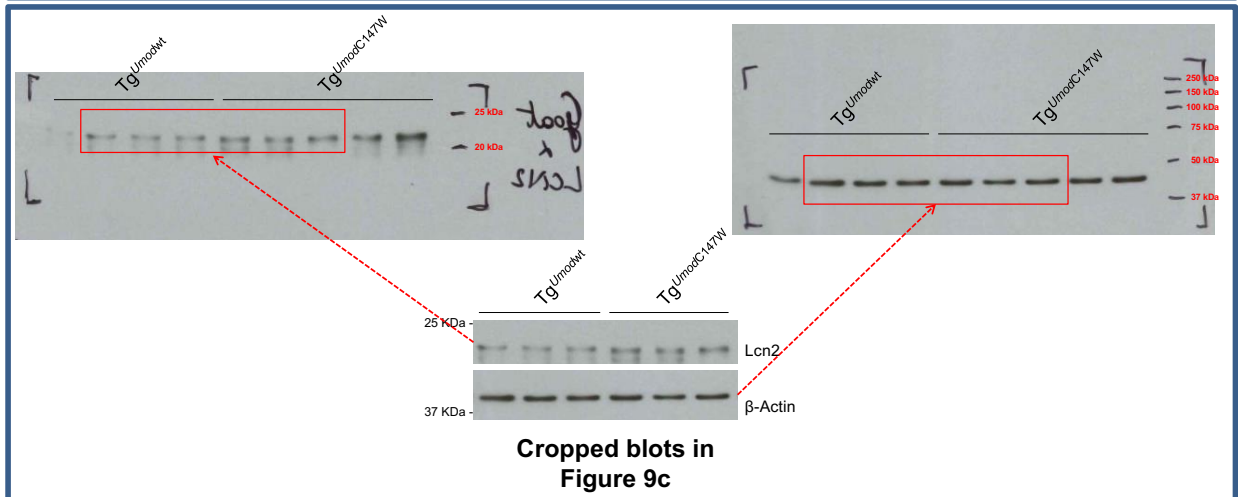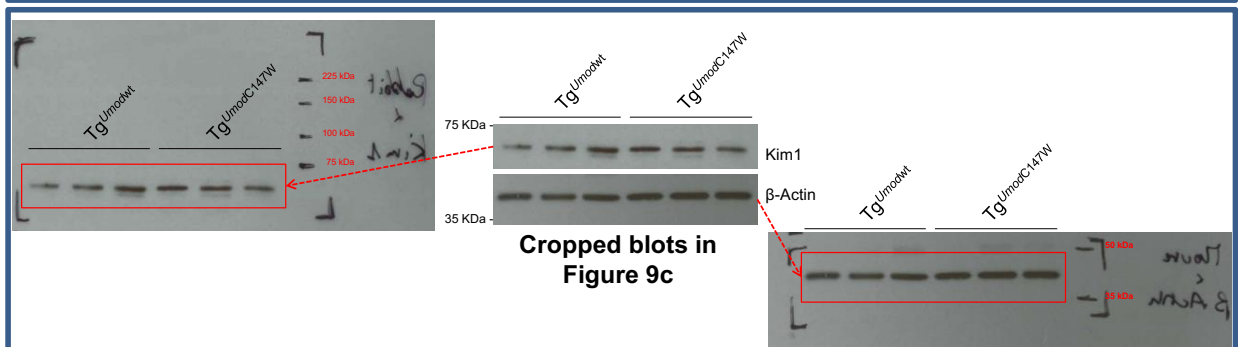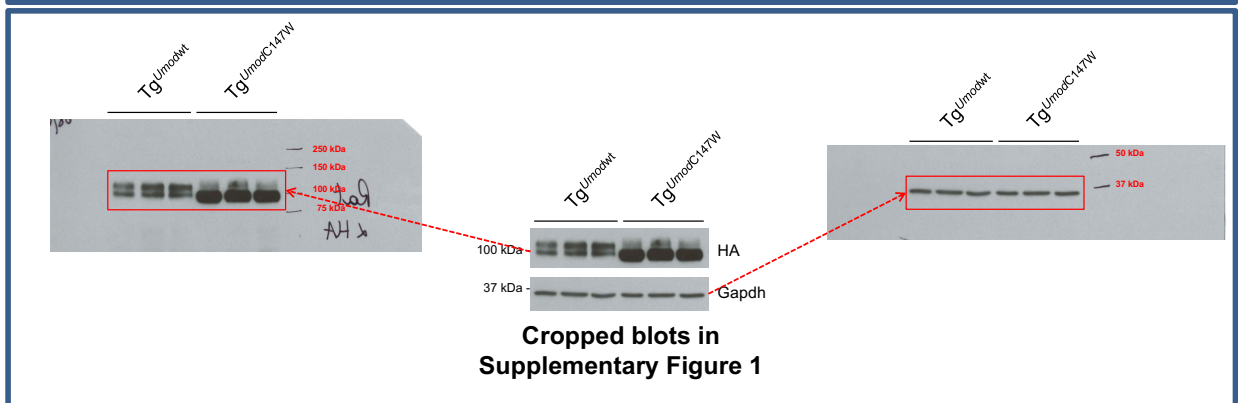

**Supplementary Figure 6.** Full image of blots shown as cropped images in **Figure 6b**, **Figure 9b**, **Figure 9c**, **Supplementary Figure 1**. The red boxes indicate the cropped images.

**Supplementary Table 1.** List of primers used for SYBR Green real-time RT-qPCR.

| <b>Target gene</b> | <b>Forward primer (5'-3')</b> | <b>Reverse primer (5'-3')</b> |
|--------------------|-------------------------------|-------------------------------|
| <i>Ccl5</i>        | GTGCCCACGTCAAGGAGTATT         | CCCACCTTCTTCTCTGGGTTGG        |
| <i>Ccl12</i>       | CATCAGTCCTCAGGTATTGGCTGGA     | CTTGGGGTCAGCACAGATCTCCTT      |
| <i>Ccl19</i>       | CTGGCCTTCAGCCTGCTGGT          | TGCGATCCACCCAGGGCTGG          |
| <i>Tgfb1</i>       | CCCGCGTGCTAATGGTGGACC         | TGCACGGGACAGCAATGGGG          |
| <i>Vim</i>         | GGATCAGCTCACCAACGACA          | GGTCAAGACGTGCCAGAGAA          |
| <i>Col6a1</i>      | ACCGACTGCGCCATTAAGAA          | GTCGGTCACCACGATCAAGT          |
| <i>Acta2</i>       | GCTACGAACTGCCTGACGG           | GCTGTTATAGGTGGTTTCGTGGA       |
| <i>Acox3</i>       | GCTCACTTCACAAGCCCTCT          | TAGCAAACAAGCCAGCGGTA          |
| <i>Ehhadh</i>      | GCCATAGTGATCTGTGGAGCA         | ACCACTGGCTTCTGGTATCG          |
| <i>Cyp4b1</i>      | CCAGCTCAGCAAGCCAGTAA          | GTGGGTCAAAGACCTCTGGG          |
| <i>Col1a1</i>      | CTGACGCATGGCCAAGAAGA          | ATACCTCGGGTTTCCACGTC          |
| <i>Ntn4</i>        | AGGATTTTCTGCCCTCCGAC          | ATGGGAGCCTTTGTCTGTGG          |
| <i>Panx1</i>       | GCTCATCTCGCTGGCCTTCGC         | AATCCACAAAGGCAGCCTGTCGC       |
| <i>Slc13a3</i>     | TATGGTGAATGAGCTGGAGA          | GGCAAACGTGCAGAACAAGAT         |
| <i>Slc25a17</i>    | GCCTCTGTGCTGTCCTACG           | ACCTGAAGCCGAAGTCTAGC          |
| <i>Cd5</i>         | CCCTTGCCAATTCGATGGGA          | GGGCTGGAAATCAGAGCAGA          |
| <i>Cd19</i>        | ACCAGTTGGCAGGATGATGG          | GCTGAGGAGCTGCATAGAGG          |
| <i>Ptprc</i>       | GGAGACCAGGAAGTCTGTGC          | GTTCTGGGCTCCTTCCTCTT          |
| <i>Cd68</i>        | CTGACAAGGGACACTTCGGG          | AGGCCAATGATGAGAGGCAG          |
| <i>Fut4</i>        | GAGGTGGGTGTGGATGAACT          | GTTGGATCGCTCCTGGAATA          |
| <i>Lcn2</i>        | TCCCCCTGCAGCCAGACTTCC         | AGTAGCGACAGCCCTGGTCCTG        |
| <i>Havcr1</i>      | TTGGCATCTGCATCGCAGCCC         | GGGAATGCACAACCGCTGCGT         |
| <i>Atf3</i>        | CAGAAGTCAGTGCGACCGCC          | TCGCCGCCTCCTTTTCTCTCA         |
| <i>Hprt1</i>       | ACATTGTGGCCCTCTGTGTG          | TTATGTCCCCCGTTGACTGA          |
